# Supplementary material
Source: publisher figshare collection journal article supplement (https://acs.figshare.com/ndownloader/files/7641133)
Supplement: Supplementary file 1 [file 7641133]

## Sheet: Sheet1
Data S1. identification of N-containing ions in the ultrahigh-resolution LC-MS analysis.
id_LCMS	retention time (min)	observed mass (m/z)	ion formula [M+H]+	theoretical exact mass (m/z)	mass error (mDa)	mass error (ppm)	remark
1	1.10537	161.09	C6H13N2O3	161.092	2.19	13.57	non-labeled_leaf data
2	1.33778	147.076	C5H11N2O3	147.076	0.45	3.08	non-labeled_flower data
3	1.33778	133.06	C4H9N2O3	133.061	0.31	2.31	non-labeled_leaf data
4	1.33778	293.146	C17H17N4O	293.14	-0.25	-0.84	non-labeled_peduncle data
5	1.39588	148.06	C5H10NO4	148.06	1.67	11.29	non-labeled_flower data
6	1.39588	490.166	C31H24NO5	490.165	-0.43	-0.87	non-labeled_leaf data
7	1.39588	132.064	C5H10NO3	132.066	1.33	10.04	non-labeled_leaf data
8	1.51207	134.044	C4H8NO4	134.045	1.4	10.47	non-labeled_petiole data
9	1.57028	174.086	C6H12N3O3	174.087	2.19	12.61	non-labeled_leaf data
10	1.57028	286.091	C12H16NO7	286.092	0.01	0.03	non-labeled_root data
11	1.74455	150.058	C5H12NO2S	150.058	0.33	2.17	non-labeled_petiole data
12	1.97692	132.102	C6H14NO2	132.102	0.33	2.47	non-labeled_leaf data
13	2.44167	268.105	C10H14N5O4	268.104	0.01	0.02	non-labeled_flower data
14	2.67402	245.077	C9H13N2O6	245.077	0.07	0.29	non-labeled_leaf data
15	2.7321	161.107	C10H13N2	161.107	0.29	1.77	non-labeled_root data
16	2.7321	308.092	C10H18N3O6S	308.091	-0.19	-0.62	non-labeled_flower data
17	3.71962	166.086	C9H12NO2	166.086	0.3	1.79	non-labeled_leaf data
18	4.0101	284.099	C10H14N5O5	284.099	-0.11	-0.38	non-labeled_leaf data
19	4.76522	210.076	C10H12NO4	210.076	0.17	0.81	non-labeled_peduncle data
20	7.08907	298.097	C11H16N5O3S	298.097	-0.34	-1.14	non-labeled_leaf data
21	7.49572	283.181	C18H23N2O	283.18	-0.15	-0.51	non-labeled_root data
22	7.84427	515.241	C27H35N2O8	515.239	-2.51	-4.87	non-labeled_root data
23	7.96043	317.15	C17H21N2O4	317.15	-0.44	-1.4	non-labeled_peduncle data
24	8.01853	471.215	C25H31N2O7	471.213	-1.89	-4.01	non-labeled_stem data
25	8.07675	339.171	C20H23N2O3	339.17	-0.3	-0.9	non-labeled_leaf data
26	8.19292	369.182	C21H25N2O4	369.181	0.51	1.37	non-labeled_root data
27	8.3672	353.187	C21H25N2O3	353.186	-0.71	-2	non-labeled_leaf data
28	8.3672	283.181	C18H23N2O	283.18	-0.2	-0.72	non-labeled_root data
29	8.48338	337.191	C21H25N2O2	337.191	0.24	0.71	non-labeled_leaf data
30	8.65768	309.197	C20H25N2O	309.196	-0.4	-1.31	non-labeled_root data
31	8.83197	371.197	C21H27N2O4	371.197	-0.82	-2.21	non-labeled_peduncle data
32	9.2386	383.198	C22H27N2O4	383.197	-0.82	-2.14	non-labeled_root data
33	9.35478	355.203	C21H27N2O3	355.202	-0.64	-1.81	non-labeled_leaf data
34	9.41285	353.187	C21H25N2O3	353.186	-0.48	-1.35	non-labeled_root data
35	9.52903	357.218	C21H29N2O3	357.217	-0.82	-2.29	non-labeled_root data
36	9.6452	339.171	C20H23N2O3	339.17	-0.68	-2.01	non-labeled_leaf data
37	9.6452	517.221	C26H33N2O9	517.218	-1.92	-3.71	non-labeled_root data
38	9.7033	367.167	C21H23N2O4	367.165	0.23	0.63	non-labeled_root data
39	10.0518	498.2	C23H32NO11	498.197	-2.62	-5.25	non-labeled_leaf data
40	10.1099	351.172	C21H23N2O3	351.17	-0.76	-2.16	non-labeled_root data
41	10.168	451.125	C24H21NO8	451.126	1.06	2.36	non-labeled_leaf data
42	10.2261	531.237	C27H35N2O9	531.234	-2.3	-4.33	non-labeled_root data
43	10.2842	517.257	C20H41N2O13	517.26	3.33	6.43	non-labeled_leaf data
44	10.3423	511.209	C27H31N2O8	511.207	-2.48	-4.86	non-labeled_peduncle data
45	10.4004	337.191	C21H25N2O2	337.191	-0.49	-1.45	non-labeled_flower data
46	10.4585	323.176	C20H23N2O2	323.175	0.29	0.91	non-labeled_leaf data
47	10.4585	265.17	C18H21N2	265.17	1.88	7.08	non-labeled_root data
48	10.5166	385.213	C22H29N2O4	385.212	-0.78	-2.03	non-labeled_petiole data
49	10.6909	409.177	C23H25N2O5	409.176	0.08	0.19	non-labeled_root data
50	10.8651	353.186	C21H25N2O3	353.186	-0.83	-2.36	non-labeled_leaf data
51	10.9232	559.232	C28H35N2O10	559.229	-3.18	-5.68	non-labeled_root data
52	11.0975	337.19	C21H25N2O2	337.191	1.87	5.56	non-labeled_flower data
53	11.3299	348.148	C21H20N2O3	348.147	-0.45	-1.29	non-labeled_peduncle data
54	11.3879	409.178	C23H25N2O5	409.176	0.08	0.19	non-labeled_root data
55	11.3879	365.151	C21H21N2O4	365.15	-1.18	-3.24	non-labeled_root data
56	11.3879	435.161	C17H27N2O11	435.161	0.23	0.52	non-labeled_root data
57	11.6204	349.156	C21H21N2O3	349.155	-0.57	-1.63	non-labeled_flower data
58	11.7366	393.182	C23H25N2O4	393.181	-0.93	-2.36	non-labeled_root data
59	12.0851	457.223	C32H29N2O	457.227	1.52	3.33	non-labeled_leaf data
60	12.0851	369.219	C22H29N2O3	369.217	-1	-2.7	non-labeled_stem data
61	12.1432	427.224	C31H27N2	427.217	1.52	3.56	non-labeled_flower data
62	12.55	379.167	C22H23N2O4	379.165	-1.04	-2.74	non-labeled_root data
63	12.7242	423.194	C24H27N2O5	423.191	-0.93	-2.2	non-labeled_root data
64	14.9317	499.21	C26H31N2O8	499.207	-2.44	-4.89	non-labeled_root data
65	19.1148	206.045	C10H8NO4	206.045	0.18	0.86	non-labeled_peduncle data
